CORRECTION

# Correction: Bacterial gene 5' ends have unusual mutation rates that can mislead tests of selection

The *PLOS Biology* Staff

## Notice of Republication

This article was republished on January 8, 2026, to correct errors in Figure 5 and Figure 6 that were introduced during the typesetting process. The publisher apologizes for the errors. Please download this article again to view the correct version. The originally published, uncorrected article and the republished, corrected articles are provided here for reference.

## Supporting information

**S1 File. Originally published, uncorrected article.**

(PDF)

**S2 File. Republished, corrected article.**

(PDF)

## Reference

1. Radrizzani S, Rivas-Santisteban J, Han N, Hurst LD. Bacterial gene 5' ends have unusual mutation rates that can mislead tests of selection. *PLoS Biol.* 2025;23(12):e3003569. <https://doi.org/10.1371/journal.pbio.3003569> PMID: [41397037](https://pubmed.ncbi.nlm.nih.gov/41397037/)

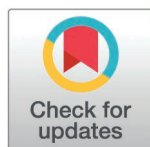

## OPEN ACCESS

**Citation:** The *PLOS Biology* Staff (2026) Correction: Bacterial gene 5' ends have unusual mutation rates that can mislead tests of selection. *PLoS Biol* 24(1): e3003612. <https://doi.org/10.1371/journal.pbio.3003612>

**Published:** January 20, 2026

**Copyright:** © 2026 The *PLOS Biology* Staff. This is an open access article distributed under the terms of the [Creative Commons Attribution License](https://creativecommons.org/licenses/by/4.0/), which permits unrestricted use, distribution, and reproduction in any medium, provided the original author and source are credited.
